# Supplementary material
Source: PubMed Central journal article supplement (PMC2494530)
Supplement: NIHMS58570-supplement-1.pdf [file NIHMS58570-supplement-1.pdf]

# Supporting Information

## Dioxygen Activation at Non-Heme Diiron Centers: Oxidation of a Proximal Residue in the I100W Mutant of Toluene/*o*-Xylene Monooxygenase Hydroxylase

*Leslie J. Murray,<sup>1</sup> Ricardo García-Serres,<sup>2</sup> Michael S. McCormick,<sup>1</sup> Roman Davydov,<sup>3</sup> Sunil Naik,<sup>2</sup>  
Sun-Hee Kim,<sup>3</sup> Brian M. Hoffman,<sup>3</sup> Boi Hanh Huynh,<sup>2</sup> and Stephen J. Lippard<sup>1</sup>*

<sup>1</sup>Department of Chemistry, Massachusetts Institute of Technology, Cambridge, MA, <sup>2</sup>Department of Physics, Emory University, Atlanta, GA, and <sup>3</sup>Department of Chemistry, Northwestern University, Evanston, IL

[lippard@mit.edu](mailto:lippard@mit.edu); [vhuynh@physics.emory.edu](mailto:vhuynh@physics.emory.edu); and [bmh@northwestern.edu](mailto:bmh@northwestern.edu)

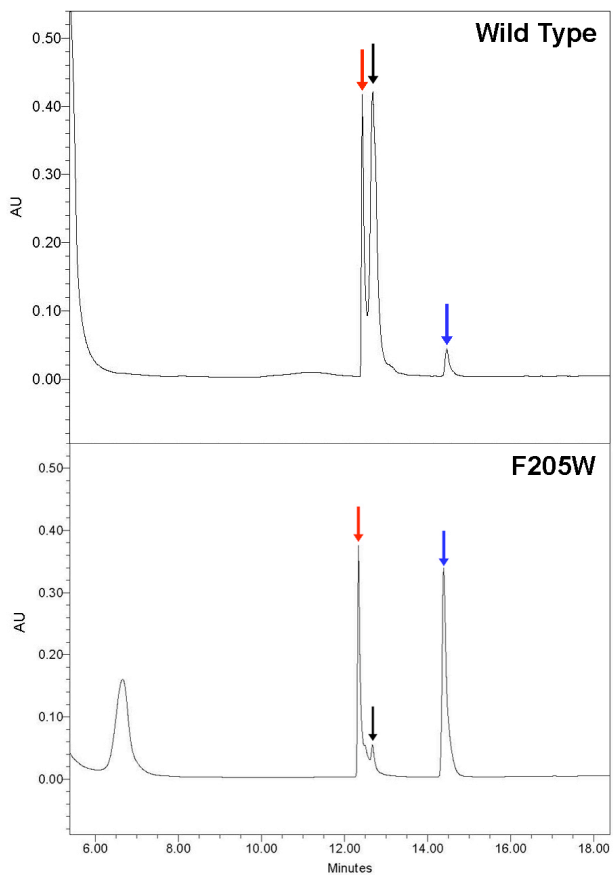

**Figure S1.** HPLC traces at 280 nm of steady-state reaction mixtures for wild-type and F205W mutant hydroxylases. Catechol (black arrow) is the only observed product in reactions. The peak corresponding to phenol (blue arrow), the substrate used in these assays, was of a lower intensity in the reaction containing the F205W mutant, consistent with the reduced steady-state activity of this hydroxylase. The compound eluting at 6 min does not arise from hydroquinone, as determined by HPLC traces for samples doped with this compound. A background peak at ~ 12.5 min (red arrow) appears in all traces with equal intensity.

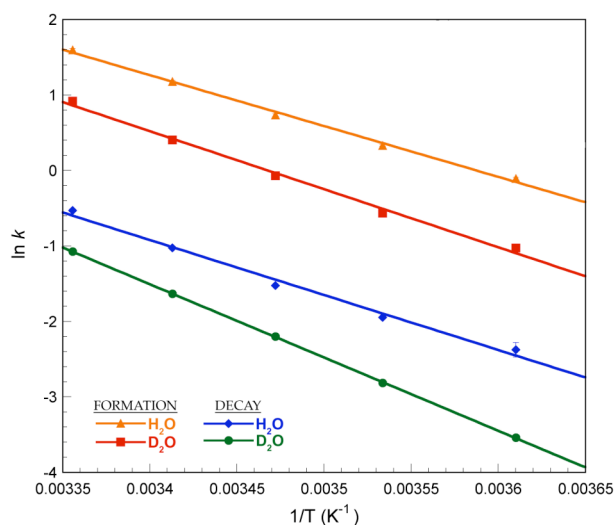

**Figure S2.** Arrhenius plots for formation and decay rates of the mixed-valent diiron(III,IV)-W\* formed during the reaction of ToMOH<sub>red</sub> I100W:3ToMOD with dioxygen. The difference in activation energy for both phases in protic versus deuterated buffers is non-zero as determined from the Arrhenius plots (right). The temperature dependence of  $k_H/k_D$  is therefore non-zero for both processes with the decay exhibiting a stronger dependence than formation. This data imply that hydrogen atom transfer or tunneling from W100 to the diiron(III) intermediate does not occur during formation.

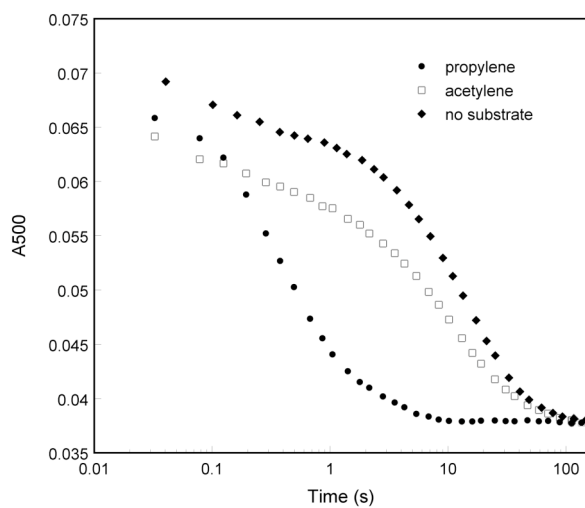

**Figure S3.** Effect of propylene and acetylene on the decay rate of the tryptophanyl radical. Propylene, a substrate for  $\text{MMOH}_{\text{peroxo}}$ , accelerates  $k_d$  by more than 50-fold to  $2.8 \text{ s}^{-1}$  whereas acetylene has only a minor effect.

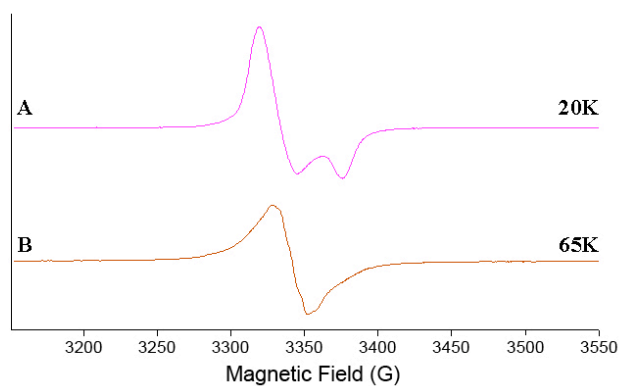

**Figure S4.** X-band EPR spectra of the diiron(III,IV)–W<sup>•</sup> species at (A) 20 K and (B) 65 K. (A) The spectrum at 20 K contains the anisotropic features associated with the diiron center with the radical signal saturated. (B) The spectrum at 65 K of the intermediate predominantly arises from the W<sup>•</sup> radical. The diiron center is not saturated below 60 K.

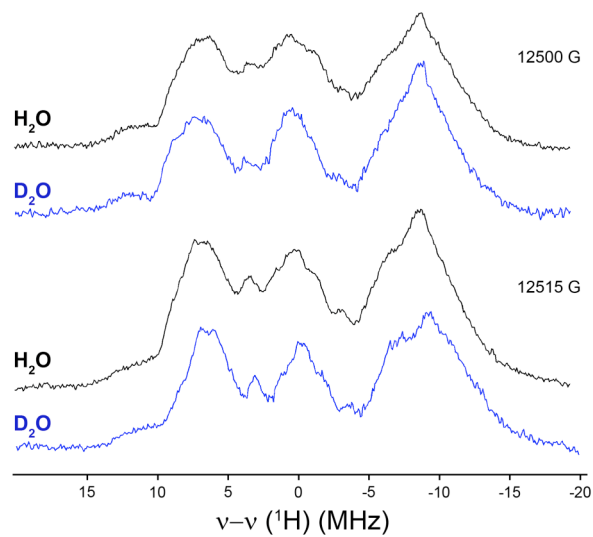

**Figure S5.** <sup>1</sup>H-Mims ENDOR spectra of the tryptophan radical in buffers containing H<sub>2</sub>O (black) and D<sub>2</sub>O (blue). The two spectra are superimposable indicating that there are no exchangeable protons on the radical. The spectra, as for the <sup>2</sup>H-Mims spectra, are dominated by signals from the indole protons.



**Table S1. Sequences for Mutagenic Primers for the  $\alpha$ -Subunit of ToMOH**

| <b>MUTATION</b> | <b>PRIMER</b> | <b>SEQUENCE (5' to 3')</b>                               |
|-----------------|---------------|----------------------------------------------------------|
| I100W           | sense         | caactcactcggagcg <b>TGG</b> gcacttgaagaatacg             |
|                 | antisense     | cgtattctcaagtc <b>CCA</b> cgctccgaagtgaagtg              |
| I100Y           | sense         | ggtagcactatgcaactcactcggagcg <b>TAT</b> gcacttgaagaatacg |
|                 | antisense     | cgtattctcaagtc <b>ATA</b> cgctccgaagtgaagtgcatagtgctaacc |
| F205W           | sense         | ggctcaccaatatgcag <b>TGG</b> ctcggttgccg                 |
|                 | antisense     | cggccaaccgag <b>CCA</b> ctgcataatggtgaagcc               |
| L208F           | sense         | gcagttctcgg <b>TTC</b> cgccgctgacgctgctgaggccg           |
|                 | antisense     | cggcctcagcagcgtcagcggc <b>GAA</b> accgagaaactgc          |



**Table S2. Data Collection and Refinement Statistics for ToMOH I100W**

|                                   | ToMOH <sub>ox</sub>   |
|-----------------------------------|-----------------------|
| Data Collection                   |                       |
| Beamline                          | SSRL 9-2              |
| Wavelength (Å)                    | 0.979                 |
| Space Group                       | P3 <sub>1</sub> 21    |
| Unit cell dimensions (Å)          | 182.4 x 182.4 x 68.0  |
| Resolution range (Å)              | 50 - 2.1              |
| Total Reflections                 | 449931                |
| Unique Reflections                | 70195                 |
| Completeness (%)*                 | 84.7 (83.6)           |
| I/s(I)                            | 27.2 (19.4)           |
| Rsym (%)                          | 6.4 (54.1)            |
| Phasing method                    | Molecular Replacement |
| Refinement                        |                       |
| Rcryst (%)                        | 21.7                  |
| Rfree (%)                         | 28.4                  |
| No. Protein Atoms                 | 7352                  |
| No. Non-Protein Atoms             | 204                   |
| r.m.s deviation bond length (Å)   | 0.034                 |
| r.m.s deviation bond angles (°)   | 2.76                  |
| Average B-value (Å <sup>2</sup> ) | 50.8                  |

**Table S3. Distances Between the Atoms of the Side-Chain of W100 and the Diiron Active Site**

| Position <u>A</u> Distances (Å)    | C <sub>α</sub> | C <sub>β</sub> | C <sub>γ</sub> | C <sub>δ1</sub> | C <sub>δ2</sub> | C <sub>ε2</sub> | C <sub>ε3</sub> | C <sub>ζ2</sub> | C <sub>ζ3</sub> | C <sub>η2</sub> | N <sub>ε</sub> |
|------------------------------------|----------------|----------------|----------------|-----------------|-----------------|-----------------|-----------------|-----------------|-----------------|-----------------|----------------|
| Fe1                                | 8.8            | 8.1            | 9.0            | 9.7             | 9.3             | 10.3            | 9.2             | 11.1            | 10.1            | 11.0            | 10.5           |
| Fe2                                | 10.6           | 10.0           | 10.6           | 11.4            | 10.6            | 11.5            | 10.1            | 11.9            | 10.7            | 11.6            | 11.9           |
| μ-OH (hydroxide)                   | 10.3           | 9.5            | 10.1           | 10.8            | 10.4            | 11.2            | 10.2            | 11.8            | 10.9            | 11.7            | 11.4           |
| μ-OH (glycerol)                    | 8.5            | 7.8            | 8.5            | 9.4             | 8.6             | 9.6             | 8.2             | 10.2            | 8.9             | 9.9             | 10.0           |
| H <sub>2</sub> O (terminal on Fe1) | 8.3            | 7.3            | 7.9            | 8.5             | 8.2             | 9.0             | 8.3             | 9.8             | 9.1             | 9.8             | 9.1            |
| Position <u>B</u> Distances (Å)    | C <sub>α</sub> | C <sub>β</sub> | C <sub>γ</sub> | C <sub>δ1</sub> | C <sub>δ2</sub> | C <sub>ε2</sub> | C <sub>ε3</sub> | C <sub>ζ2</sub> | C <sub>ζ3</sub> | C <sub>η2</sub> | N <sub>ε</sub> |
| Fe1                                | 8.7            | 8.2            | 8.0            | 8.9             | 7.2             | 7.7             | 6.3             | 7.5             | 6.0             | 6.7             | 8.7            |
| Fe2                                | 10.6           | 10.2           | 9.7            | 10.4            | 8.5             | 8.7             | 7.6             | 8.0             | 6.8             | 7.0             | 9.7            |
| μ-OH (hydroxide)                   | 10.3           | 9.6            | 9.2            | 9.9             | 8.3             | 8.5             | 7.5             | 8.1             | 7.0             | 7.3             | 9.5            |
| μ-OH (glycerol)                    | 8.4            | 8.1            | 7.6            | 8.4             | 6.5             | 6.9             | 5.5             | 6.3             | 4.9             | 5.3             | 8.0            |
| H <sub>2</sub> O (terminal on Fe1) | 8.2            | 7.4            | 6.9            | 7.6             | 6.2             | 6.5             | 5.7             | 6.3             | 5.5             | 5.8             | 7.3            |

**Table S4. Formation and Decay Rate Constants for I100W Transient in H<sub>2</sub>O and D<sub>2</sub>O Buffers**

| Temp<br>( $\pm 0.1$ °C) | H <sub>2</sub> O         |                          | D <sub>2</sub> O         |                          | Formation<br>$k_H/k_D$ | Decay<br>$k_H/k_D$ |
|-------------------------|--------------------------|--------------------------|--------------------------|--------------------------|------------------------|--------------------|
|                         | $k_f$ (s <sup>-1</sup> ) | $k_d$ (s <sup>-1</sup> ) | $k_f$ (s <sup>-1</sup> ) | $k_d$ (s <sup>-1</sup> ) |                        |                    |
| 4.0                     | 0.90 $\pm$ 0.01          | 0.093 $\pm$ 0.009        | 0.358 $\pm$ 0.002        | 0.029 $\pm$ 0.001        | 2.51 $\pm$ 0.04        | 3.2 $\pm$ 0.3      |
| 10.0                    | 1.39 $\pm$ 0.02          | 0.143 $\pm$ 0.002        | 0.567 $\pm$ 0.003        | 0.060 $\pm$ 0.001        | 2.46 $\pm$ 0.03        | 2.36 $\pm$ 0.05    |
| 15.0                    | 2.09 $\pm$ 0.03          | 0.218 $\pm$ 0.002        | 0.93 $\pm$ 0.04          | 0.111 $\pm$ 0.001        | 2.24 $\pm$ 0.08        | 1.97 $\pm$ 0.02    |
| 20.0                    | 3.25 $\pm$ 0.05          | 0.359 $\pm$ 0.008        | 1.50 $\pm$ 0.06          | 0.195 $\pm$ 0.001        | 2.17 $\pm$ 0.09        | 1.84 $\pm$ 0.04    |
| 25.0                    | 4.9 $\pm$ 0.1            | 0.59 $\pm$ 0.01          | 2.50 $\pm$ 0.07          | 0.342 $\pm$ 0.001        | 1.97 $\pm$ 0.07        | 1.72 $\pm$ 0.02    |

**Table S5. Formation and Decay Rate Constants at Varying pH Values**

| <b>pH</b> | <b><math>k_f</math> (s<sup>-1</sup>)</b> | <b><math>k_d</math> (s<sup>-1</sup>)</b> |
|-----------|------------------------------------------|------------------------------------------|
| 6.5       | 0.66 ± 0.01                              | 0.0417 ± 0.0006                          |
| 6.6       | 0.71 ± 0.01                              | 0.052 ± 0.005                            |
| 7.0       | 0.86 ± 0.04                              | 0.070 ± 0.003                            |
| 7.2       | 1.05 ± 0.02                              | 0.095 ± 0.001                            |
| 7.5       | 1.13 ± 0.02                              | 0.091 ± 0.001                            |
